# Supplementary material for: Serum Antibody Titers against Distemper, Parvovirus and In-fectious Hepatitis in Dogs from Central Spain
Source: Preprints.org preprint supplement (doi:10.20944/preprints202405.1072.v1), 2024-05-16
Supplement: Supplementary file 1 [file supplementary]

**Table S1**. Presence of IgG Antibodies against CPV, CDV, and CAV-1 in Vaccinated and Non-Vaccinated Dogs Segregated by Colorimetric Scale.

|  | **IgG against CPV** | | | | | | |
| --- | --- | --- | --- | --- | --- | --- | --- |
| **Vaccination Status** | **negative**  **n (%)** | **inconclusive n(%)** | **weak positive n(%)** | **positive n(%)** | **positive n(%)** | **highly positive n(%)** | **highly positive n(%)** |
| Non-vaccinated | 1 (2.2) | 2 (4.3) | 3 (6.5) | 3 (6.5) | 8 (17.4) | 21 (45.7) | 8 (17.4) |
| Vaccinated | 2 (3.0) | 6 (9.1) | 6 (9.1) | 3(4.5) | 9(13.6) | 17 (25.8) | 23 (34.8) |
|  | **IgG against CDV** | | | | | | |
| Non-vaccinated | 1 (2.2) | 5 (10.9) | 10 (21.7) | 9 (19.6) | 11 (23.9) | 8 (17.4) | 2 (4.3) |
| Vaccinated | 0 (0.0) | 3 (4.5) | 9 (13.6) | 12 (18.2) | 20 (30.3) | 21 (31.8) | 1 (1.5) |
|  | **IgG against CAV-1** | | | | | | |
| Non-vaccinated | 8 (17.4) | 6 (13.0) | 12 (26.1) | 1 (2.2) | 14 (30.4) | 4 (8.7) | 1 (2.2) |
| Vaccinated | 2 (3.0) | 8 (12.1) | 7 (10.6) | 9 (13.6) | 13 (19.7) | 18 (27.3) | 9 (13.6) |

Color intensity was read using a CombCam automatic reader (Biogal Galed Labs) and interpreted following the manufacturer’s instructions. Color intensity results were categorized using the following scale: level 0: negative result; level 1: inconclusive; level 2: weak positive; levels 3 and 4: positive results; and levels 5 and 6: highly positive results.
